# Supplementary material for: CD52 and OXPHOS—potential targets in ibrutinib-treated mantle cell lymphoma
Source: PubMed Central journal article supplement (PMC9805448; doi:10.1038/s41420-022-01289-7), 2022-12-31
Supplement: 41420_2022_1289_MOESM1_ESM.pdf [file 41420_2022_1289_MOESM1_ESM.pdf]

## Supplementary Information

### Contents:

- **Reagents and antibodies**
- **Supplementary Table 1:** Enriched KEGG pathways of 4 d ibrutinib-treated REC-1
- **Supplementary Table 2:** Characteristics of primary samples
- **Supplementary Figure 1:** Enrichment plots for selected KEGG pathways of 4 d ibrutinib-treated REC-1
- **Supplementary Figure 2:** IACS-010759 kinetics and consecutive treatment with ibrutinib and IACS-010759

## Reagents and antibodies

### Reagents

|                                              |                                            |
|----------------------------------------------|--------------------------------------------|
| Venor <sup>®</sup> GeM OneStep kit           | Minerva Biolabs, Berlin, Germany           |
| AllPrep DNA/RNA Mini Kit                     | Qiagen, Hilden, Germany                    |
| RNA 6000 Nano Kit                            | Agilent Technologies, Santa Clara, CA, USA |
| TruSeq Stranded mRNA Library Preparation Kit | Illumina, San Diego, CA, USA               |
| OptiPrep <sup>™</sup>                        | Serumwerk Bernburg, Bernburg, Germany      |
| Ficoll <sup>®</sup> Paque Plus               | Cytiva, Marlborough, MA, USA               |
| RPMI 1640                                    | Thermo Fisher Scientific, Waltham, MA, USA |
| L-Glutamine                                  | PAN-Biotech, Aidenbach, Germany            |
| Penicillin-streptomycin                      | PAN-Biotech                                |
| 100x MEM NEAA                                | PAN-Biotech                                |
| Propidium iodide                             | Sigma-Aldrich, St. Louis, MO, USA          |

### Reagents - inhibitors

|             |                                                          |
|-------------|----------------------------------------------------------|
| Ibrutinib   | Selleck Chemicals, Absource Diagnostics, Munich, Germany |
| IACS-010759 | Selleck Chemicals                                        |

### Antibodies – cytotoxicity assays

|                                          |                                                     |
|------------------------------------------|-----------------------------------------------------|
| CD52 mAb (#MA5-16999)                    | Invitrogen, Thermo Fisher Scientific                |
| Rat IgG2bk Isotype Control (#16-4031-81) | eBioscience <sup>™</sup> , Thermo Fisher Scientific |

### Antibodies – western blots

|                                              |                                               |
|----------------------------------------------|-----------------------------------------------|
| PARP (#9532)                                 | Cell Signaling Technologies, Danvers, MA, USA |
| p-BTK (#5082)                                | Cell Signaling Technologies                   |
| BTK (#3533)                                  | Cell Signaling Technologies                   |
| β-Actin (#4970)                              | Cell Signaling Technologies                   |
| Anti-rabbit IgG, HRP-linked Antibody (#7074) | Cell Signaling Technologies                   |

### Antibodies – flow cytometry

|                                    |                                             |
|------------------------------------|---------------------------------------------|
| CD19-FITC (#FAB4867F)              | R&D Systems, Minneapolis, MN, USA           |
| C3b/iC3b-FITC (#846108)            | BioLegend, San Diego, CA, USA               |
| Mouse IgG1κ (#IC002F)              | R&D Systems                                 |
| CD52-PE (#130-123-972)             | Miltenyi Biotec, Bergisch Gladbach, Germany |
| REA Control (S) PE (#130-113-438)  | Miltenyi Biotec                             |
| CD52-APC (#130-099-632)            | Miltenyi Biotec                             |
| REA Control (S) APC (#130-113-434) | Miltenyi Biotec                             |

**Supplementary Table 1:** Enriched KEGG pathways of 4 d ibrutinib-treated REC-1

For gene sets with  $|\log_2FC| \geq 1$  and q value  $< 0.05$  of Kyoto Encyclopedia of Genes and Genomes (KEGG) pathway gene set enrichment analysis (GSEA) of 4 d ibrutinib treated REC-1 (versus untreated) see excel file of Supplementary Table 1.

**Supplementary Table 2:** Characteristics of primary samples

| Sample | Type       | Sex | Mantle cell lymphoma subtype | Therapy prior to sample collection | In vitro (treatment) |
|--------|------------|-----|------------------------------|------------------------------------|----------------------|
| P1     | PBMC       | m   | classic nodal                | no                                 | 3 d                  |
| P2     | PBMC       | m   | classic nodal                | no                                 | 3 d                  |
| P3     | PBMC       | m   | classic nodal                | yes, Nordic protocol, ibrutinib    | 2 d                  |
| P4     | PBMC       | m   | classic nodal                | no                                 | 2 d                  |
| P5     | PBMC       | f   | leukaemic non-nodal          | no                                 | 3 d                  |
| P6     | PBMC       | m   | classic nodal                | no                                 | 3 d                  |
| P7     | PBMC       | m   | classic nodal                | no                                 | 3 d                  |
| P8     | PBMC       | m   | classic nodal                | no                                 | 3 d                  |
| L1     | Lymph node | m   | classic nodal                | n.a., pre-ibrutinib era            | 2 d                  |
| L2     | Lymph node | m   | classic nodal                | n.a., pre-ibrutinib era            | 2 d                  |
| H1     | PBMC       | f   | healthy control              | no                                 | 2 d                  |
| H2     | PBMC       | f   | healthy control              | no                                 | 3 d                  |

PBMC = peripheral blood mononuclear cells, m = male, f = female, d = days

## Supplementary Figure 1

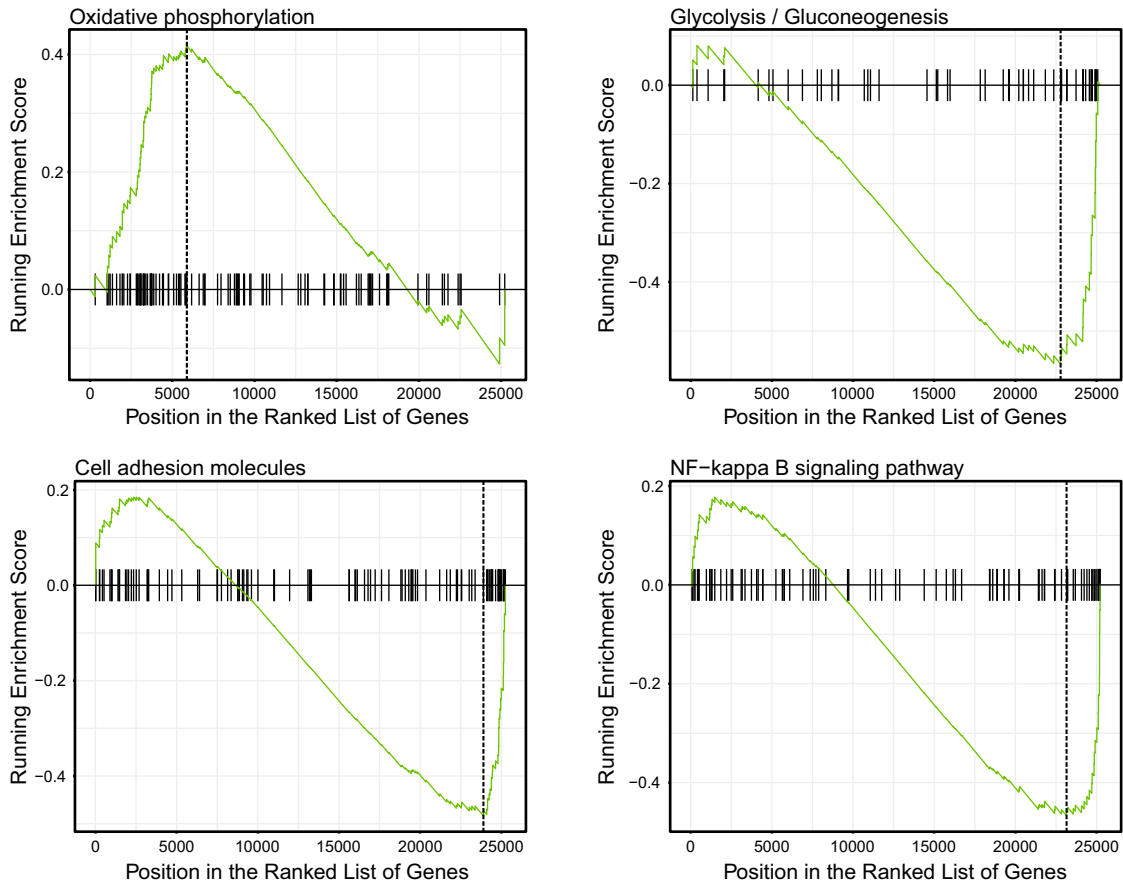

Supplementary Figure 1: Enrichment plots for selected KEGG pathways of 4 d ibrutinib-treated REC-1.

Enrichments plots of selected significant gene sets by the Kyoto Encyclopedia of Genes and Genomes (KEGG) pathway gene set enrichment analysis (GSEA) of 4 d ibrutinib treated REC-1 compared with untreated ( $|\log_2FC| \geq 1$ ,  $q\text{ value} < 0.05$ ).

## Supplementary Figure 2

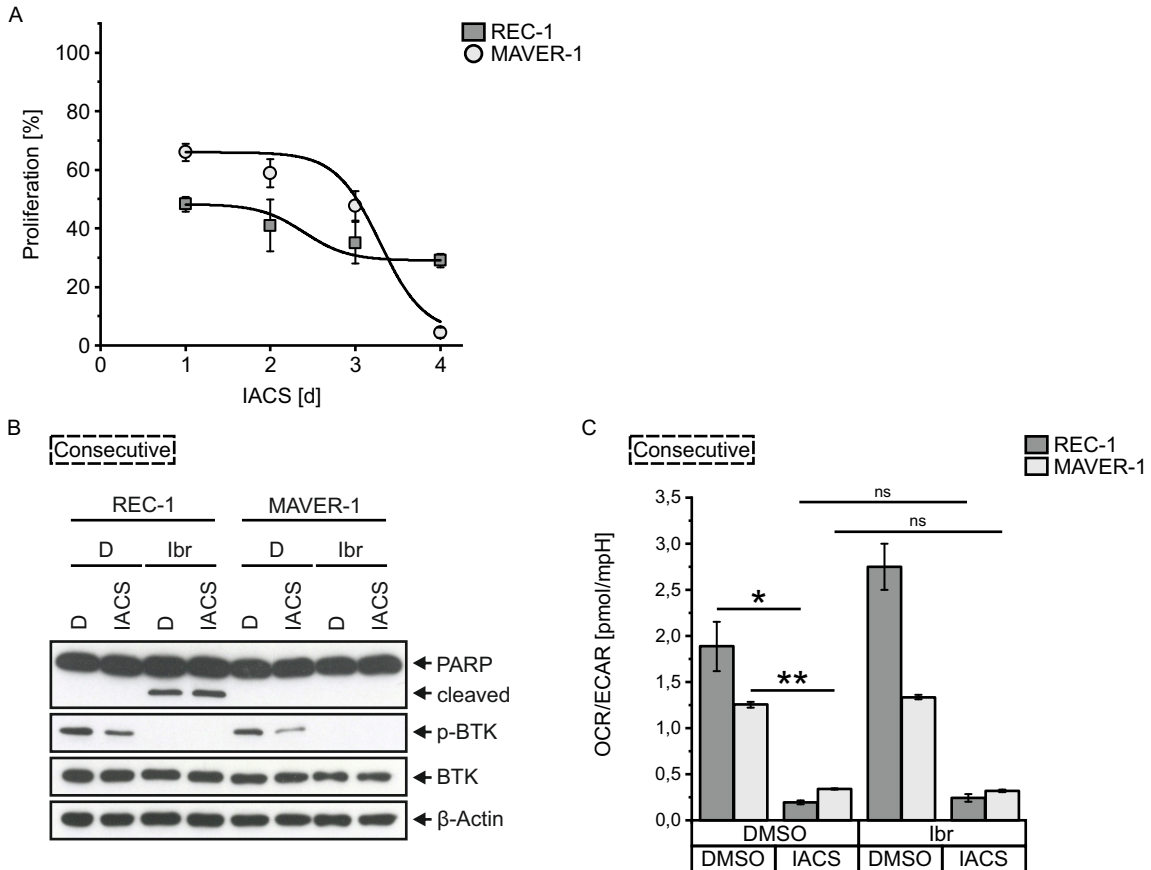

Supplementary Figure 2: IACS-010759 kinetics and consecutive treatment with ibrutinib and IACS-010759.

A) Proliferation of REC-1 and MAVER-1 across 1 to 4 d treatment with 25 nM IACS-010759, determined by 3-(4,5-dimethylthiazol-2-yl)-2,5-diphenyltetrazolium bromide (MTT) assay (N = 3). B) Western blot with PARP, p-BTK, BTK, and  $\beta$ -Actin as loading control (representative for N = 3), after consecutive treatment with 3 d ibrutinib pretreatment (400 nM, DMSO as control) followed by isolation and incubation of viable cells with 25 nM IACS-010759 or DMSO and 400 nM ibrutinib or DMSO according to pretreatment for 2 more days. C) Extracellular Flux analysis showing oxygen consumption rate (OCR) vs extracellular acidification rate (ECAR) ratios of REC-1 and MAVER-1 after consecutive treatment with 3 d ibrutinib pretreatment (400 nM, DMSO as control) followed by incubation with 25 nM IACS-010759 or DMSO and 400 nM ibrutinib or DMSO according to pretreatment for 2 more days (N = 4).

Data is shown as mean  $\pm$  SEM. Significance was determined by Student's t-test or a Welch's t-test, for equal or unequal variances, respectively. \*  $P < 0.05$ , \*\*  $P < 0.01$ ,  $P > 0.05$  not significant (ns).
