# Supplementary material for: CD52 and OXPHOS—potential targets in ibrutinib-treated mantle cell lymphoma
Source: PubMed Central journal article supplement (PMC9805448; doi:10.1038/s41420-022-01289-7), 2022-12-31

## Original western blots

### Simultaneous treatment (3 d ibrutinib + IACS)

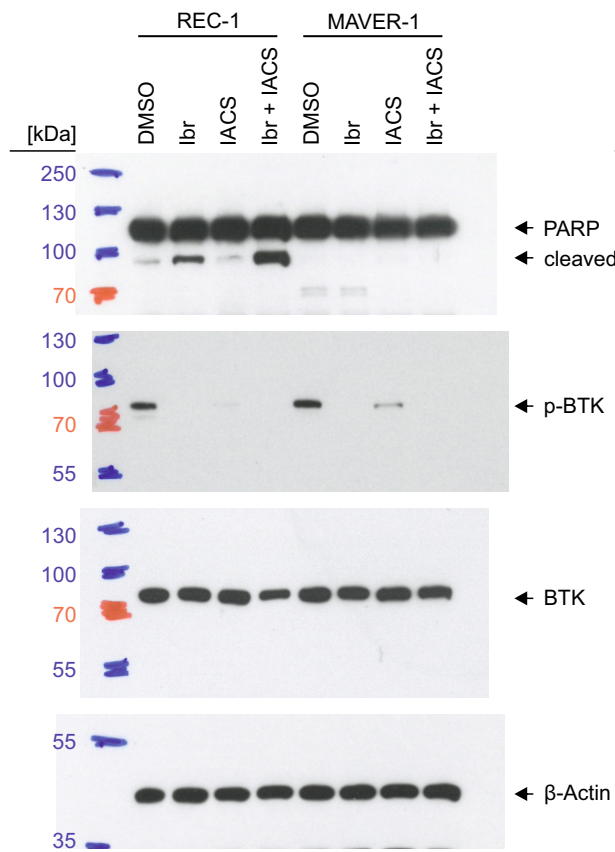

### Consecutive treatment (3 d ibrutinib + 2 d IACS)

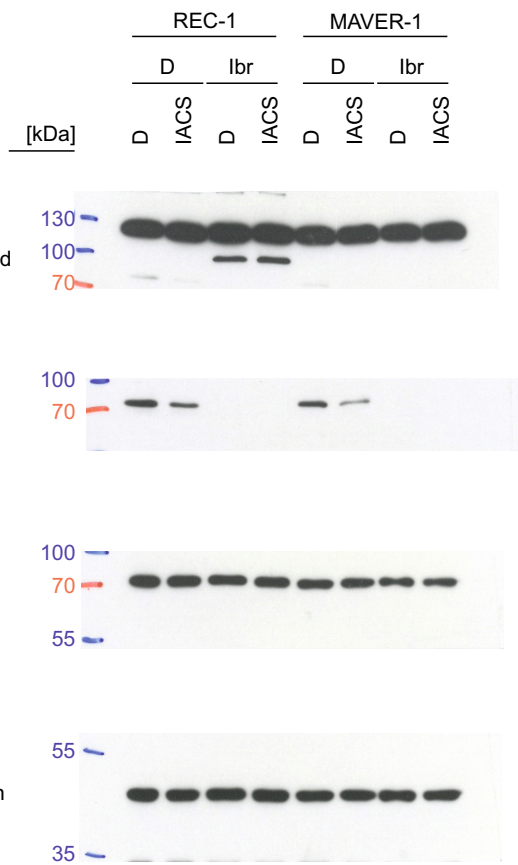

Supplement: 41420_2022_1289_MOESM3_ESM.pdf [file 41420_2022_1289_MOESM3_ESM.pdf]
